# Supplementary material for: MTHFD1 controls DNA methylation in Arabidopsis
Source: PubMed Central journal article supplement (PMC4909953; doi:10.1038/ncomms11640), 2016-06-13
Supplement: ncomms11640-s1.pdf [file ncomms11640-s1.pdf]

## Supplementary Figure 1

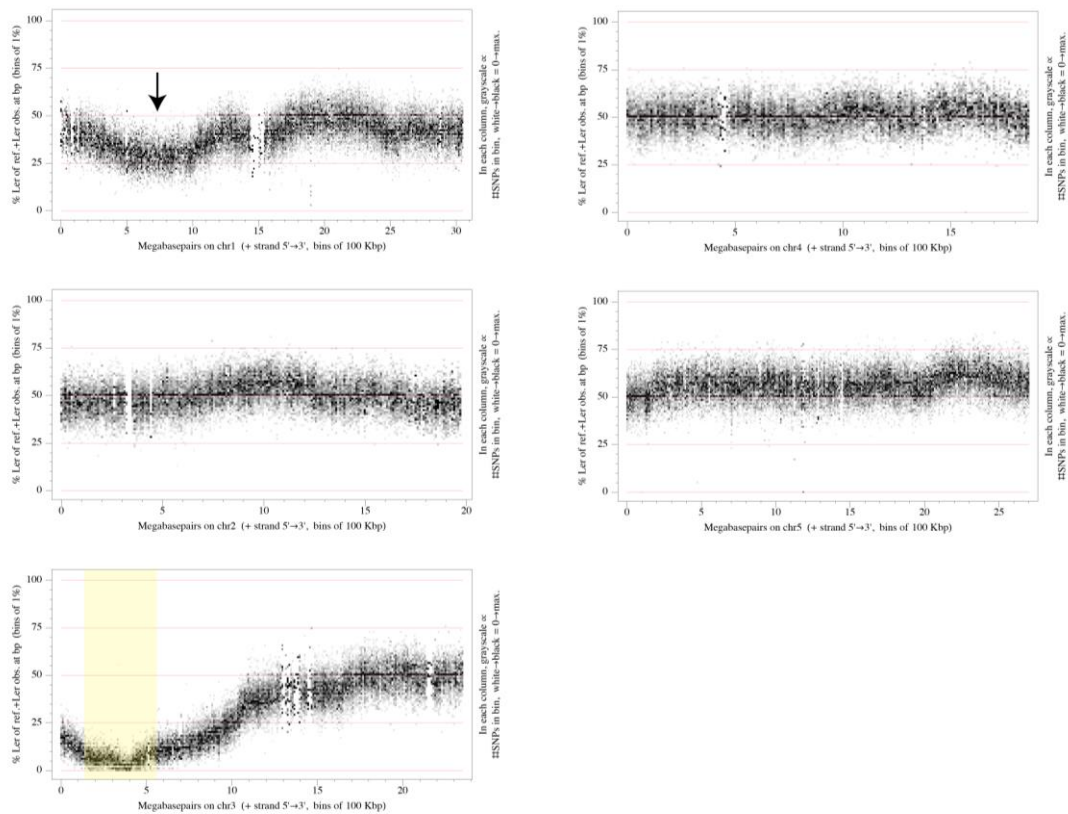

**Supplementary Figure 1.** Mapping of *mthfd1-1* by next-generation sequencing of pooled F2 mutants from a #162 x Ler cross.

Depletion of single nucleotide polymorphisms (SNPs) of *the* Landsberg (Ler) ecotype defines the target interval for the causative mutation in #162 (highlighted in yellow). The arrow indicates the insertion position of the *SDCpro-GFP* marker.

## Supplementary Figure 2

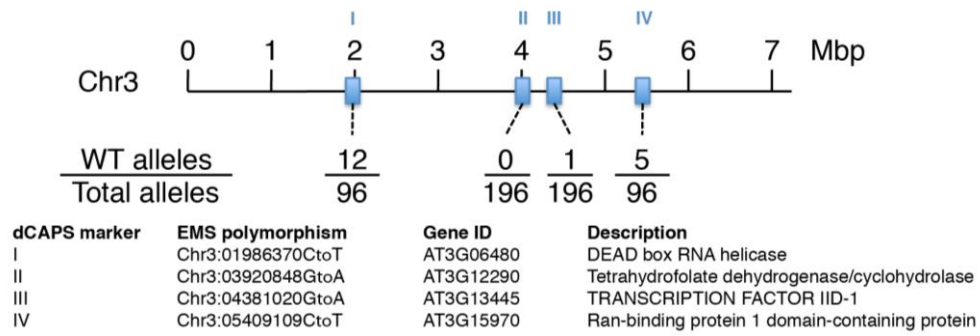

### Supplementary Figure 2. Fine mapping of *mthfd1-1*.

Co-segregation analysis of dCAPS markers from 4 candidate mutations in F2 mutants from a #162 x WT cross. Locations on chromosome 3 and allele ratios for each marker are indicated.

### Supplementary Figure 3

a

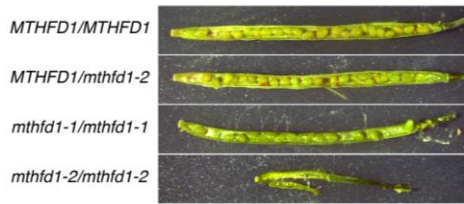

b

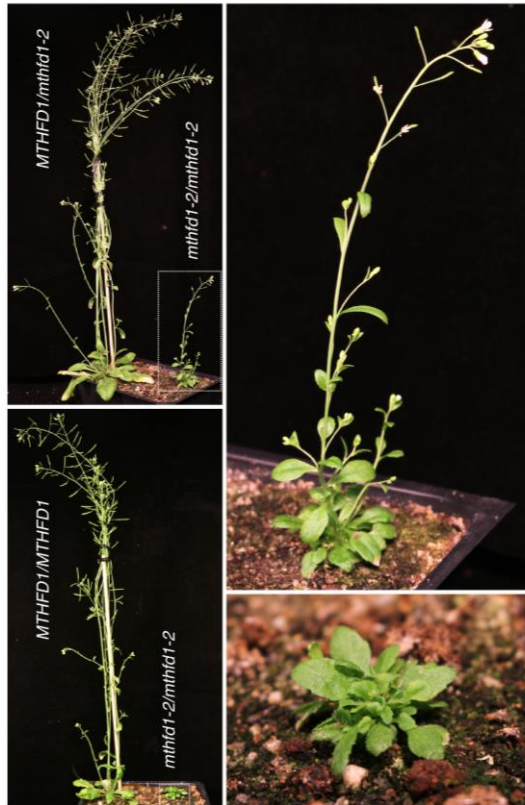

### Supplementary Figure 3. Develop-

mental phenotypes of *mthfd1* mutants.

**(a)** Siliques of homozygous *mthfd1-1* mutants show reduced number of seeds and homozygous *mthfd1-2* mutants are infertile.

**(b)** Wild-type and *mthfd1-2* mutant plants at 7 weeks after germination. Dashed boxes indicate close-ups of *mthfd1-2* mutants in right panels.

#### Supplementary Figure 4

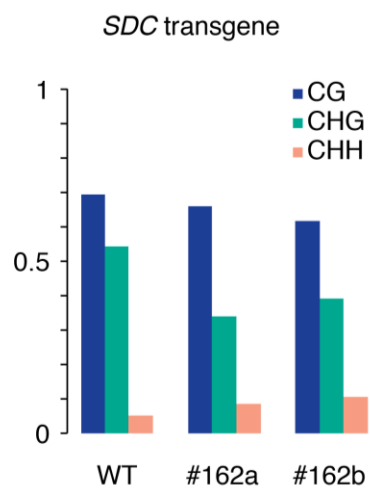

**Supplementary Figure 4.** Bisulfite sequencing of the repeat region of the transgenic *SDC* promoter.

DNA methylation levels for individual sequence contexts are shown and were calculated from at least 20 clones per sample.

## Supplementary Figure 5

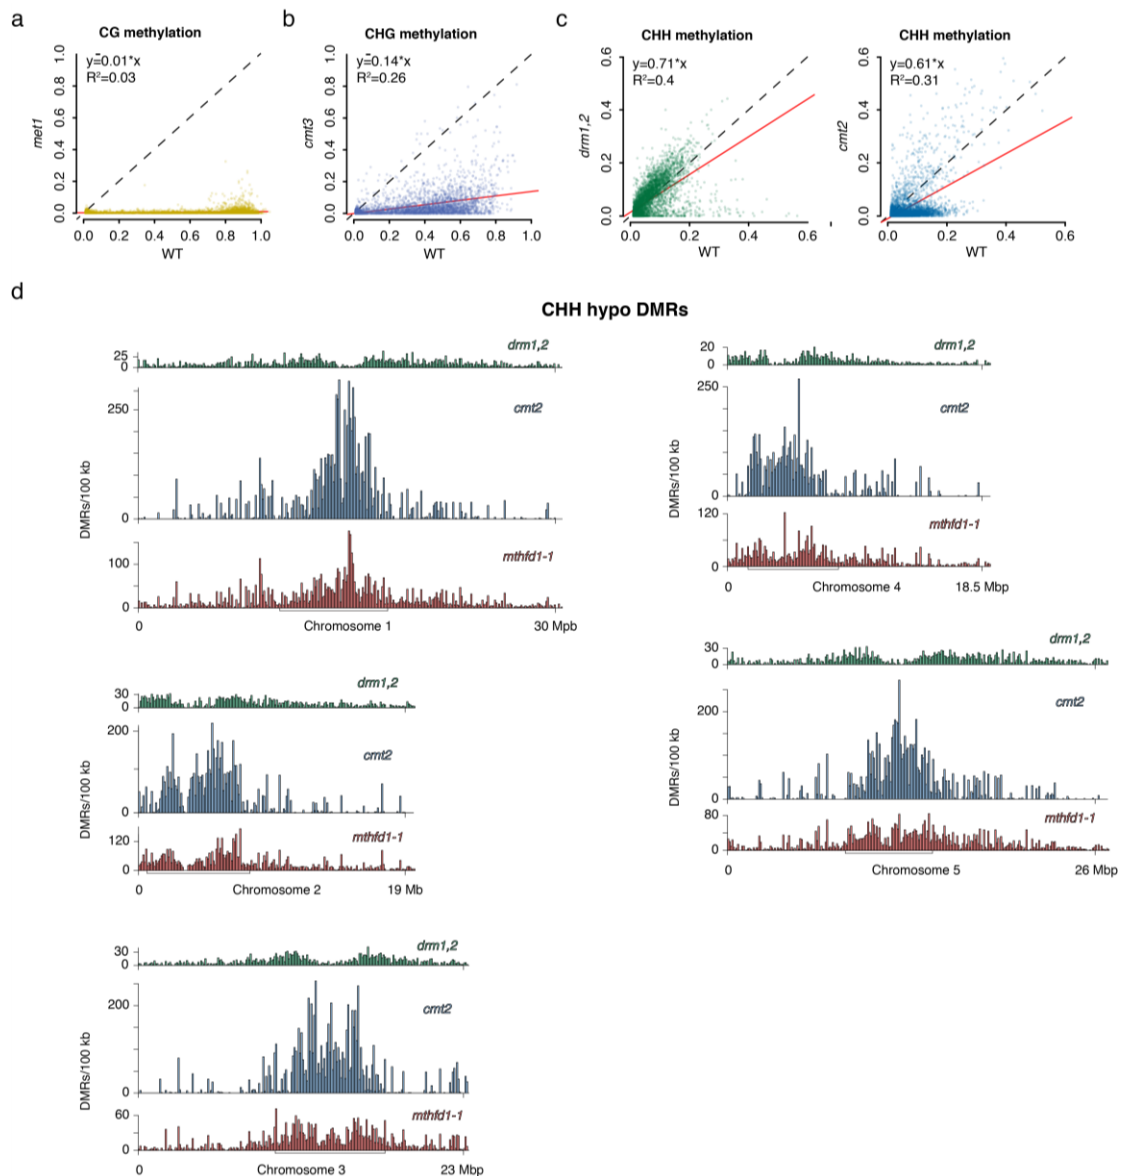

**Supplementary Figure 5.** Comparison of genome-wide DNA methylation patterns in *mthfd1-1* and DNA methyltransferase mutants.

**(a-c)** Comparison of DNA methylation levels in 5,000 random 100 bp bins with WT methylation levels  $> 0.01$  in CG **(a)**, CHG **(b)**, and CHH **(c)** contexts. Red line: linear regression between mutant and WT levels; corresponding coefficients are shown in top left corners. Dashed: identity line. **(d)** Frequency distributions of CHH hypo DMRs in 100 kb bins along the chromosomes. Boxes indicate pericentromeric regions.

## Supplementary Figure 6

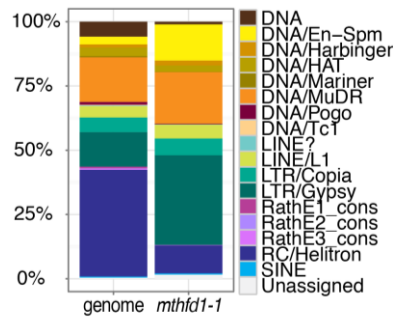

### Supplementary Figure 6. Relative distribution of TEs in transposon superfamilies.

The distribution of TEs upregulated in *mthfd1-1* relative to WT is compared to the genomic distribution of all TEs.

## Supplementary Figure 7

```

A2RVV7|MTHFD2_ARATH -----MLMIARKALASAHTKAFRLATRDVHCFSSILVSPPLVSLDLPENWIPYSDFPPP 56
Q9LHH7|MTHFD1_ARATH -----
065269|FOLD3_ARATH ----MFTDCSSSTTSRLIHLYNRNGVFLPRPSVSQFSLRTASTWRCTLSIRS----- 54
065271|FOLD4_ARATH MASMMFTDCSSTTSRLIHLNRRSSGTFLLROCVGOLRLOTTASGRGCCIRSSSSPISISS 60

A2RVV7|MTHFD2_ARATH VSFETEQKTVVIDGNVIAEEIRTKIISEVGMKKAVGKVPGLAVVLVGEQRDSQTYVRNK 114
Q9LHH7|MTHFD1_ARATH MASSSDHTAKIIDGKAIATHTIRSEIAEEVRLSEKHGKVPGLAVVIVGSRKDSQTYVNTK 60
065269|FOLD3_ARATH ---SSSPSAIVIDGKAEAKKIRDDKIEVSRMKESIGVVA----- 92
065271|FOLD4_ARATH ADTKSEGGAIVIDGKAVAKKIRDELTIEVSRMKESIGVIPGLAVILVGDGRKDSATYVRNK 120

A2RVV7|MTHFD2_ARATH IKACEETGIKSVLAELPEDCTEGQIISVLRKFNEDTSTIHGILVQLPLPQHLESKILNMV 174
Q9LHH7|MTHFD1_ARATH RKACAIEVGIKSFVGLPEEVSEADLISKVHELNSNPDVHGILVQLPLPKHINEEHILGAI 120
065269|FOLD3_ARATH -----EDSSEEEVLKYVSGFNDDPSVHGVLVQLPLPSHMDEQNILNAV 130
065271|FOLD4_ARATH KKACDSVGIKSFVRLAEDSSEEEVLKSVSGFNDDPSVHGILVQLPLPSHMDEQNILNAV 180

A2RVV7|MTHFD2_ARATH RLEKDVDGFHPLNVGNLAMRGREPLFVSCPTKGCVELLIRTGVEIAGKNAVVIGRSNIVG 234
Q9LHH7|MTHFD1_ARATH SIDKDVDGFHPLNIGKLAMRGREPLFLPCTPKGCLELLARSQVGIKQRAVVVGRSNIVG 180
065269|FOLD3_ARATH SIEKDVDGFHPLNIGRLAMRGREPLFVPCPTKGCIELLHRYNIEFKGKRAVVIGRSNIVG 190
065271|FOLD4_ARATH SIEKDVDGFHPLNIGRLAMRGREPLFVPCPTKGCIELLHRYNIEIKGKRAVVIGRSNIVG 240

A2RVV7|MTHFD2_ARATH LPMSLLLQRHDATVSTVHAFTKDPEHITRKADIVIAAAGIPNLVIRGSLKPGAVVIDVGT 294
Q9LHH7|MTHFD1_ARATH LPVSLLLLKADATVTVVHSHTKDPEAIIREADIVIAACGQAHMIKGNWIKPGAVIDVGT 240
065269|FOLD3_ARATH MPAALLLQKEDATVSIHSRTMNPEELTRQADILISAVGKPNMVRGSWIKPGAVLIDVGI 250
065271|FOLD4_ARATH MPAALLLQREDATVSIHSRTKNPEEITREADIIISAVGQPNMVRGSWIKPGAVLIDVGI 300

A2RVV7|MTHFD2_ARATH TPVEDSSCEFGYRLVGDVCEYEALGVASAITPVPGGVGPMITMLLCNTLEAAKRIFL-- 352
Q9LHH7|MTHFD1_ARATH NAVSDPSKKSQYRLVGDVDFAEASKVAGFITPVPGGVGPMTVAMLLRNTVDGAKRVFGE- 299
065269|FOLD3_ARATH KPVEDPSAAGGERLVGDICYVEASKIASAITPVPGDVGPMTIAMLLSNTLTSAKRIHNFQ 310
065271|FOLD4_ARATH NPVEDPSAARGYRLVGDICYEASKVASAITPVPGGVGPMTIAMLLSNTLTSAKRIHNFQ 360

```

**Supplementary Figure 7.** Multiple sequence alignment of the four MTHFD1 homologs in *Arabidopsis*. Mitochondrial and plastidic targeting peptides are highlighted in bold and underlined, respectively <sup>1-3</sup>. Uniprot identifiers are shown at the beginning of each line.

## Supplementary Figure 8

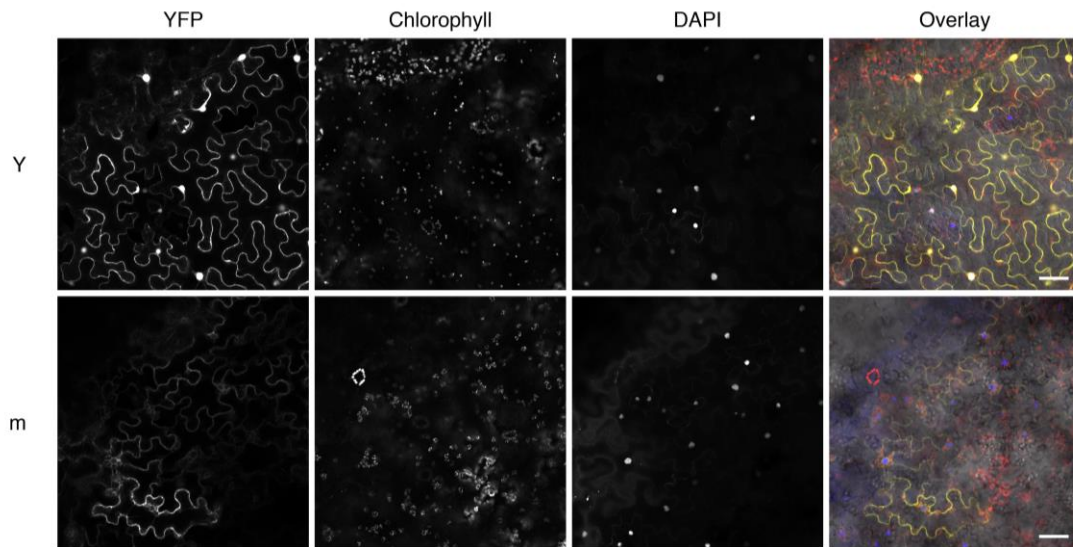

**Supplementary Figure 8.** Cytoplasmic localization of MTHFD1\_R175Q-YPET-3xFLAG. Confocal micrographs of free YFP (Y) and MTHFD1\_R175Q-YPET-3xFLAG (m) transiently expressed in *N. benthamiana*. Excitation ( $\lambda$ , nm)/Filter ( $\lambda$ , nm): YFP = 514/519-559, Chlorophyll = 488/630-730, DAPI = 405/409-530, and fluorescence overlay with bright field. Scale bars: 50  $\mu$ m.



## Supplementary Figure 9

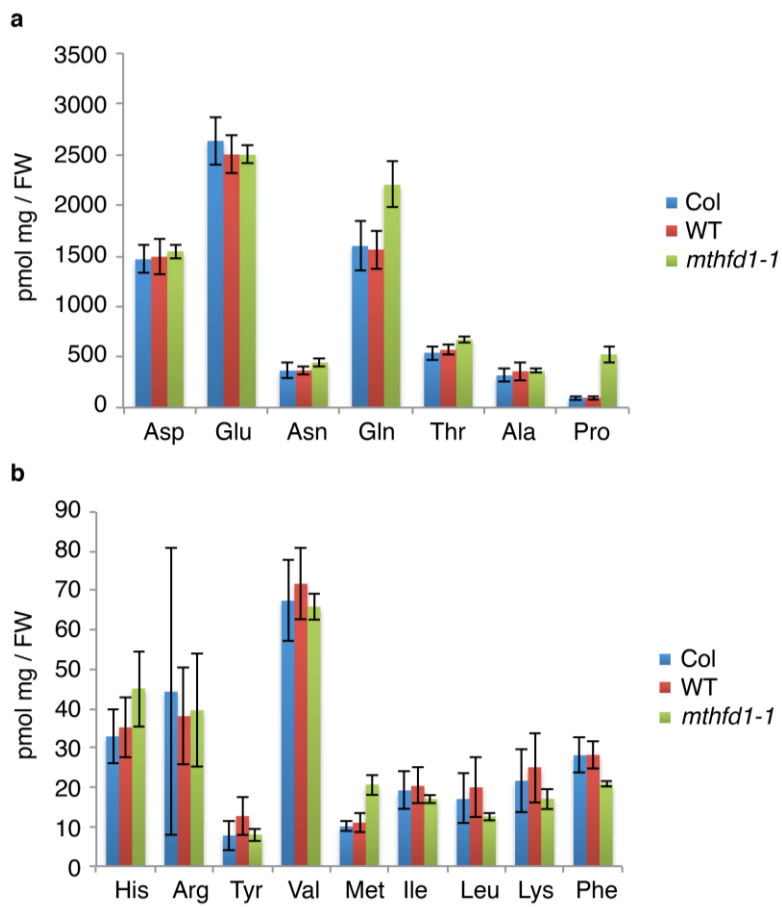

**Supplementary Figure 9.** Amino acid levels in rosette leaves of wild type plants without (Col) and with *SDCpro-GFP* (WT) and *mthfd1-1* mutants 3 weeks after germination.

Mean steady state levels  $\pm$  SD ( $n \geq 3$ ) for highly (a) and lowly abundant (b) amino acids are shown.

## Supplementary Figure 10

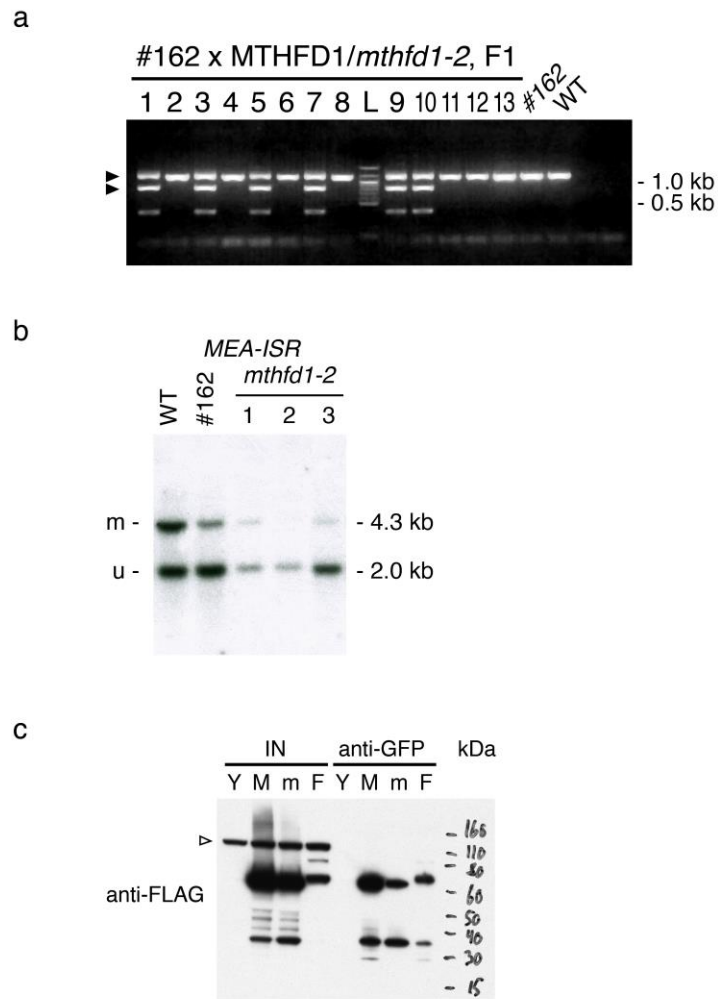

**Supplementary Figure 10.** Uncropped gel and blot images. **(a)** Uncropped image of ethidium bromide agarose gel shown in main Figure 1c. Arrowheads mark bands corresponding to WT/*mthfd1-1* (upper) and *mthfd1-2* (lower). **(b)** Uncropped image of DNA blot shown in main Figure 1e. Upper and lower bands correspond to methylated (m) and unmethylated (u) fragments, respectively. **(c)** Uncropped image of Western blot shown in main Figure 6b. Free YFP (Y), MTHFD1-YPET-3xFLAG (M), MTHFD1\_R175Q- YPET-3xFLAG (m), or FOLD4-YPET-3xFLAG (F). Arrowhead indicates unspecific binding of anti-FLAG (shown as loading reference).

**Supplementary Table 1.** Survival of *mthfd1-2* mutants 3 weeks after planting

| Parent | # wild-type | # mutants | # of seeds planted |
|--------|-------------|-----------|--------------------|
| A      | 81          | 7         | 102                |
| B      | 51          | 3         | 66                 |
| C      | 27          | 1         | 30                 |
| Total  | 159         | 11        | 198                |

## Supplementary Table 2. Primers used in this work.

### Co-segregation analysis

| Name    | Sequence (5'-3')                   | Description                               |
|---------|------------------------------------|-------------------------------------------|
| JP10089 | CAACGAGCAGTTGTTGTAGGCC             | CAPS II fo, digest PCR product with HpaII |
| JP10090 | TGGTGTGAGAATGTACAGTTGTG            | CAPS II re, digest PCR product with HpaII |
| JP10093 | GGTTAAAGATAAAAAAATCTACCTTA<br>CTAG | CAPS III fo, digest PCR product with SpeI |
| JP10094 | GTTTTATGTTTCCAGCGTTTTG             | CAPS III re, digest PCR product with SpeI |
| JP10038 | ACCAAAGCCTCTACCACTACCAC            | CAPS I fo, digest PCR product with AluI   |
| JP10039 | TGGCCGTGAGGGTGGGTTTGAAGC           | CAPS I re, digest PCR product with AluI   |
| JP9576  | AGCATCTTCAGCACTCGGT                | CAPS IV fo, digest PCR product with HinfI |
| JP9580  | CAGGTTGACCTTAAACGCAAG              | CAPS IV re, digest PCR product with HinfI |

### Genotyping of T-DNA insertion mutants

| Name    | Sequence (5'-3')       | Description            |
|---------|------------------------|------------------------|
| JP10325 | GCGGGAAATTACATATTTGCC  | WiscDsLox244C04_LP     |
| JP10326 | TGCACCCAATATATGCTCCTC  | WiscDsLox244C04_RP     |
| JP10327 | ACAATGTCAGCTTCCCGTATG  | SALK_015165.35.05.x_LP |
| JP10328 | GCGGTCTATCTGAGAAACACG  | SALK_015165.35.05.x_RP |
| JP10203 | TTCCAACATCAATTACTGCAGC | SALK_039538_LP         |
| JP10204 | CACTGTTATTTTGTTCGCTGG  | SALK_039538_RP         |

### Bisulfite sequencing

| Name   | Sequence (5'-3')                    | Description  |
|--------|-------------------------------------|--------------|
| JP6349 | GAAAAAGTTGGAATGGGTTTGGAGAG<br>TTTAA | SDC_BSPCR fo |
| JP6350 | CAACAAACCCTAATATATTTTATATTAA<br>AAC | SDC_BSPCR re |

### Chop-PCR

| Name   | Sequence (5'-3')                        | Description     |
|--------|-----------------------------------------|-----------------|
| JP6699 | ACTTAATTAGCACTCAAATTAACAAAA<br>TAAGT    | <i>AtSN1</i> fo |
| JP6700 | TTTAAACATAAGAAGAAGTTCCTTTTTTC<br>ATCTAC | <i>AtSN1</i> re |

### DNA blot

| Name  | Sequence (5'-3')                   | Description       |
|-------|------------------------------------|-------------------|
| JP980 | AAACCTTTCGTAAGCTACAGCCACTTT<br>GTT | <i>MEA-ISR</i> fo |
| JP981 | TCGGATTGGTTCCTCCTACCTCTTTAC<br>CTT | <i>MEA-ISR</i> re |

### Real-time RT-PCR

| Name    | Sequence (5'-3')            | Description  |
|---------|-----------------------------|--------------|
| JP9642  | GTATCCTTTGGCCCGGTATT        | ROMANIAT5 fo |
| JP9643  | GCCTCTTCGAAATGCCATAA        | ROMANIAT5 re |
| JP9055  | AGTCCTTTTGGTTGCTGAACA       | ATCOPIA28 fo |
| JP9056  | CCGGATGTAGCAACATTCCTACT     | ATCOPIA28 re |
| JP9640  | AACTAACGTCATTACATACACATCTTG | soloLTR fo   |
| JP9641  | AATTAGGATCTTGTTTGCCAGCTA    | soloLTR re   |
| JP10137 | TATGTTTGCGGTGGGTGCTGTG      | SADHU3-2 fo  |
| JP10138 | ACAGCCTAAACCCACCAATCCG      | SADHU3-2 re  |
| JP2452  | TCGTGGTGGTGAGTTTGTTAC       | ACTIN fo     |

JP2453 CAGCATCATCACAAGCATCC ACTIN re

### Molecular cloning

| Name    | Sequence (5'-3')                      | Description                    |
|---------|---------------------------------------|--------------------------------|
| JP14184 | CATAGTCTCgAgCGCAGCTGAAAACATGC         | Genomic At3g12290 plus XhoI fo |
| JP14185 | AGTAGAactagTccCTCGCCAAAGACACGC        | Genomic At3g12290 plus SpeI re |
| JP14186 | CTTCGTCATCTTCGAGTGTGAGT               | Sequencing                     |
| JP14187 | ATGTCCATGGTTAGTTGTGGCGG               | of                             |
| JP14188 | GATCCTGAGGCTATCATAACGG                | pMLBART-MTHFD1-                |
| JP14189 | GGATGGGCACCACGCCGGTGAACAG             | YPET-3xFLAG                    |
| JP14190 | TTTTTgTCGacTCTGGTAAGACCACACAATTTCAAC  | Genomic At4g00620 plus Sall fo |
| JP14191 | AAGTGACtaGTCcCTGGAAGTTGTGAATCCTCTTAGC | Genomic At4g00620 plus SpeI re |
| JP14192 | CATCGTCTCTTCTCTGCTCTGC                | Sequencing                     |
| JP14193 | AGCAGTAATCCTTGTTGGTGACAG              | of                             |
| JP14194 | GATGCAACCGTTAGCATTATCC                | pMLBART-FOLD4-YPET-3xFLAG      |

**Supplementary Table 3.** Next-generation sequencing reads statistics.

| Whole genome bisulfite sequencing libraries   | Sample                            | Total reads | Uniquely mapping    | Chloroplast DNA methylation             |
|-----------------------------------------------|-----------------------------------|-------------|---------------------|-----------------------------------------|
| SxaQSEQsXB015L2                               | WT                                | 198,893,778 | 170,067,128 (85.5%) | CG: 0.00467, CHG: 0.0043, CHH: 0.00342  |
| SxaQSEQsXB015L3                               | <i>mthfd1-1</i>                   | 209,247,195 | 171,879,530 (82.1%) | CG: 0.00353, CHG: 0.00318, CHH: 0.00254 |
| Libraries for global DNA methylation analysis | Sample                            | Total reads | Uniquely mapping    | Chloroplast DNA methylation             |
| SxaQSEQsVA089L8_idx13                         | WT mock, rep. 1                   | 10,125,290  | 7,623,663 (75.3%)   | CG: 0.00365, CHG: 0.00358, CHH: 0.00361 |
| SxaQSEQsVA089L8_idx14                         | WT mock, rep. 2                   | 8,836,836   | 7,735,717 (87.5%)   | CG: 0.00333, CHG: 0.00323, CHH: 0.00334 |
| SxaQSEQsVA089L8_idx15                         | <i>mthfd1-1</i> mock, rep. 1      | 9,942,581   | 8,578,233 (86.3%)   | CG: 0.00355, CHG: 0.00323, CHH: 0.00354 |
| SxaQSEQsVA089L8_idx16                         | <i>mthfd1-1</i> mock, rep. 2      | 8,411,130   | 6,340,794 (75.4%)   | CG: 0.00367, CHG: 0.00334, CHH: 0.00343 |
| SxaQSEQsVA089L8_idx18                         | WT 5-CHO-THF, rep. 1              | 9,530,658   | 7,895,562 (82.8%)   | CG: 0.00311, CHG: 0.00297, CHH: 0.00315 |
| SxaQSEQsVA089L8_idx19                         | WT 5-CHO-THF, rep. 2              | 8,168,179   | 6,031,979 (73.8%)   | CG: 0.00319, CHG: 0.00289, CHH: 0.00302 |
| SxaQSEQsVA089L8_idx20                         | <i>mthfd1-1</i> 5-CHO-THF, rep. 1 | 9,315,578   | 5,901,462 (63.4%)   | CG: 0.00331, CHG: 0.00303, CHH: 0.00308 |
| SxaQSEQsVA089L8_idx21                         | <i>mthfd1-1</i> 5-CHO-THF, rep. 2 | 9,912,881   | 7,821,124 (78.9%)   | CG: 0.00331, CHG: 0.0029, CHH: 0.00326  |
| SxaQSEQsVA089L8_idx05                         | WT Met., rep. 1                   | 10,184,219  | 8,563,684 (84.1%)   | CG: 0.00317, CHG: 0.00298, CHH: 0.00304 |
| SxaQSEQsVA089L8_idx06                         | WT Met, rep. 2                    | 11,717,668  | 8,575,529 (73.2%)   | CG: 0.00333, CHG: 0.00298, CHH: 0.0031  |
| SxaQSEQsVA089L8_idx09                         | <i>mthfd1-1</i> Met, rep. 1       | 8,136,220   | 5,558,156 (68.3%)   | CG: 0.0034, CHG: 0.00296, CHH: 0.00341  |
| SxaQSEQsVA089L8_idx12                         | <i>mthfd1-1</i> Met, rep. 2       | 9,643,906   | 6,655,212 (69.0%)   | CG: 0.00321, CHG: 0.00298, CHH: 0.00326 |
| SxaQSEQsVA089L8_idx25                         | WT SMZ                            | 9,811,942   | 8,260,623 (84.2%)   | CG: 0.00309, CHG: 0.00325, CHH: 0.0033  |
| SxaQSEQsVA089L8_idx27                         | <i>mthfd1-1</i> SMZ               | 11,300,244  | 7,895,026 (69.9%)   | CG: 0.00323, CHG: 0.00288, CHH: 0.00315 |
| SxaQSEQsWA135L8_idx_22                        | WT 5-CH3-THF, rep. 1              | 12,106,226  | 10,810,330 (89.3%)  | CG: 0.00474, CHG: 0.00441, CHH: 0.00510 |
| SxaQSEQsWA135L8_idx_23                        | WT 5-CH3-THF, rep. 2              | 12,843,726  | 11,106,325 (86.5%)  | CG: 0.00400, CHG: 0.00389, CHH: 0.00407 |

| SxaQSEQsWA135L8_idx_25 | mthfd1-1 5-<br>CH3-THF, rep. 1 | 14,776,761  | 12,983,150<br>(87.9%) | CG: 0.00392,<br>CHG: 0.00372,<br>CHH: 0.00403 |
|------------------------|--------------------------------|-------------|-----------------------|-----------------------------------------------|
| SxaQSEQsWA135L8_idx_27 | mthfd1-1 5-<br>CH3-THF, rep. 2 | 15,142,392  | 13,010,480<br>(85.9%) | CG: 0.00391,<br>CHG: 0.00372,<br>CHH: 0.00401 |
| RNA-seq libraries      | Sample                         | Total reads | Mapping               | Mapping with<br>>1 and <21<br>alignments      |
| SxaQSEQsXA013L5_idx5   | <i>mthfd1-1 a</i>              | 24,452,864  | 23,105,348<br>(94.5%) | 1,077,215                                     |
| SxaQSEQsXA013L5_idx7   | <i>mthfd1-1 b</i>              | 22,024,389  | 20,798,917<br>(94.4%) | 828,238                                       |
| SxaQSEQsXA013L5_idx9   | WT                             | 19,750,105  | 18,613,116<br>(94.2%) | 849,450                                       |

## Supplementary References

- 1 Collakova, E. *et al.* Arabidopsis 10-formyl tetrahydrofolate deformylases are essential for photorespiration. *Plant Cell* **20**, 1818-1832, doi:10.1105/tpc.108.058701 (2008).
- 2 Ito, J. *et al.* Analysis of the Arabidopsis cytosolic proteome highlights subcellular partitioning of central plant metabolism. *J Proteome Res* **10**, 1571-1582, doi:10.1021/pr1009433 (2011).
- 3 Zybailov, B. *et al.* Sorting signals, N-terminal modifications and abundance of the chloroplast proteome. *PLoS One* **3**, e1994, doi:10.1371/journal.pone.0001994 (2008).
